# Supplementary material
Source: publisher figshare collection journal article supplement (https://acs.figshare.com/ndownloader/files/10913879)
Supplement: Supplementary file 1 [file 10913879]

Compound Number	Smiles
1	c12c(cc(cc1)Nc1ncnc3c1nc[nH]3)CNC2=O
2	c12c(cc(cc1)Nc1ncncc1)C(NC2=O)C
3	c12c(cc(cc1)Nc1ncncc1)C(NC2=O)(C)C
4	c1cc(cnc1)-c1n2cccc(c2nc1)C(=O)N
5	c1c(ccc(c1)C1CCCN1)-c1c([nH]nc1C)C
6	c1(cc(n[nH]1)C1CCNCC1)-c1ccncc1
7	n1cnccc1Nc1ccc(cc1)C(N)=O
8	n1cnccc1Nc1ccc(cc1)C(N)=O
9	c12c(cc(cc1)Nc1ncncc1)C(NC2=O)C
10	c12c(cc(cc1)Nc1ncncc1)C(NC2=O)(C)C
11	n1cnccc1NC1=CC=C(NC1=O)C(N)=O
12	C1=C2N(C(C(=C1)Nc1ncncc1)=O)C(NC2=O)(C)C
13	c1cc(ncn1)NC=1C(N2C(=C(C1)F)C(=O)NC2(C)C)=O
14	c1cc(ncn1)NC=1C(N2C(=C(C1)C)C(=O)NC2(C)C)=O
15	n1cnccc1NC=1C(N2C(=C(C1)Cl)C(NC2(C)C)=O)=O
16	n1cnc(cc1Nc1cc2c(cc1)C(NC2)=O)NC(=O)C1CC1
17	n1c(cc(nc1)NC=1C(N2C(=CC1)C(NC2(C)C)=O)=O)NC(=O)C1CC1
18	c1(cc(ncn1)NC=1C(N2C(=C(C1)Cl)C(=O)NC2(C)c1cccc(c1)Cl)=O)NC(C1CC1)=O
19	n1c(ccc2n1c(cn2)-c1ccc2c(c1)ccnc2)O[C@@H]1C[C@H](C1)N
20	n1cnc(cc1NC=1C(N2C(=C(C1)Cl)C(NC21CCCCC1)=O)=O)NC(C1CC1)=O
21	n1cnc(cc1NC=1C(N2C(=C(C1)Cl)C(NC21CCCCC1)=O)=O)N
22	ClC1=C(C(NC23CCCCC3)=O)N2C(C(Nc4ncnc(N)c4Cl)=C1)=O
23	n1cnc(cc1NC=1C(N2C(=C(C1)C)C(NC21CCCCC1)=O)=O)N
24	n1c(cc(nc1)NC=1C(N2C(=C(C1)Cl)C(NC2(C)C)=O)=O)N
25	c1(cc(ncn1)NC=1C(N2C(=C(C1)Cl)C(=O)NC21CCCC1)=O)N
26	n1cnc(cc1NC=1C(N2C(=C(C1)C)C(NC21CCC(CC1)(F)F)=O)=O)N
